# Supplementary material
Source: Elsevier journal article supplement (https://www.sciencedirect.com/science/article/pii/S030089321930466X)
Supplement: mmc1 [file S030089321930466X:mmc1.docx]

MATERIAL ADICIONAL

**Figura 1 del material adicional.** Distribución de los pacientes del estudio de acuerdo a su puntación en la puntuación de riesgo MAGGIC.

**Figura 2 del material adicional.** Capacidad discriminativa de la puntuación MAGGIC para el riesgo de muerte a 1 año: curva operador-receptor.

**Figura 3 del material adicional.** Capacidad discriminativa de la puntuación MAGGIC para el riesgo de muerte a 3 años: curva operador-receptor.
